# Supplementary material
Source: publisher site journal article supplement (https://www.dovepress.com/article/442344)
Supplement: Supplementary file 1 [file get_supplementary_file.php]

## Supplementary Material

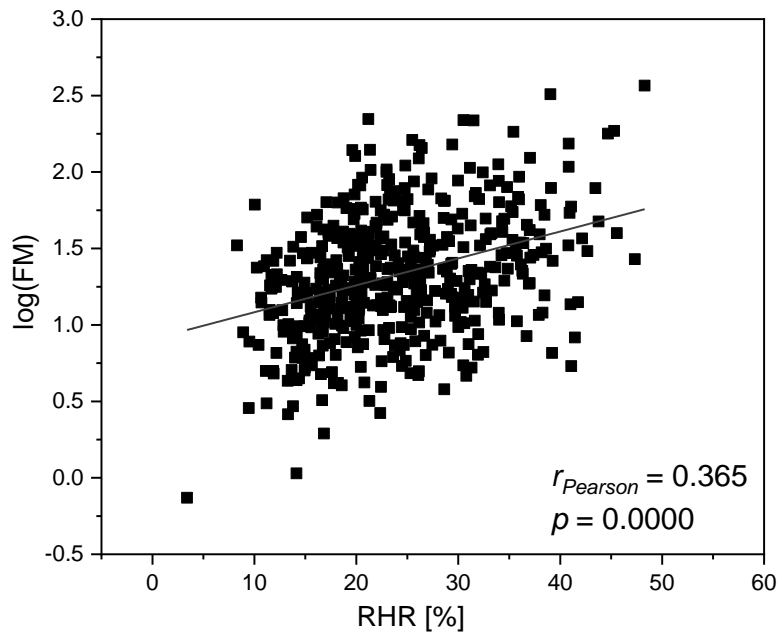

**Figure 1S** Correlation between the log(FM) and RHR parameters for the studied group (n = 482).

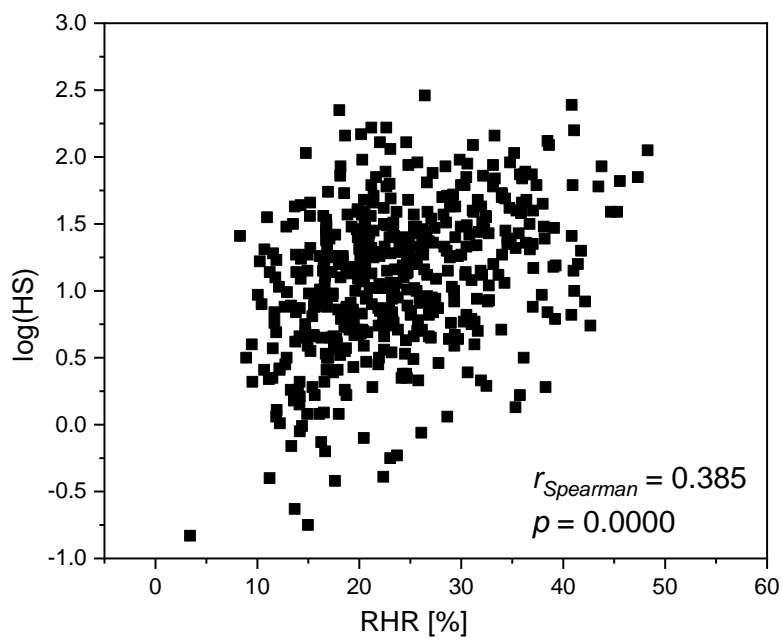

**Figure 2S** Correlation between the log(HS) and RHR parameters for the studied group (n = 482).

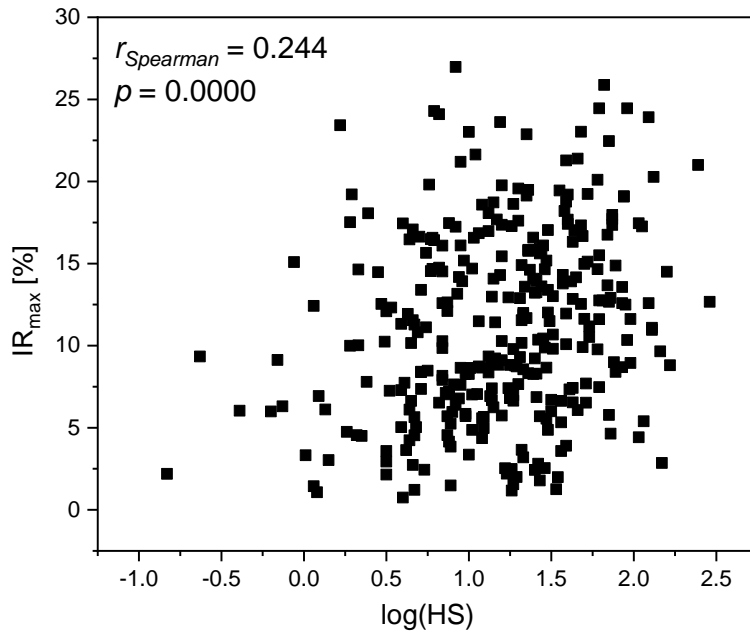

**Figure 3S** Correlation between the  $IR_{max}$  and  $\log(HS)$  parameters for the group with positive ischemic response ( $IR_{max} > 0$ ,  $n = 320$ ).

**Table 1S** Characteristics of the group at age 90+

|                                                  |              |
|--------------------------------------------------|--------------|
| <b>N</b>                                         | 9            |
| <b>Female/ Male</b>                              | 6/ 3         |
| <b>Age [years]</b>                               | 92.3 ± 1.9   |
| <b>BMI [kg/m<sup>2</sup>]</b>                    | 25.1 ± 4.0   |
| <b>DBP [mm Hg]</b>                               | 63.8 ± 8.8   |
| <b>SBP [mm Hg]</b>                               | 136.0 ± 16.7 |
| <b>FL<sub>base</sub> × 10<sup>3</sup> [a.u.]</b> | 629 ± 139    |
| <b>IR<sub>max</sub> [%]</b>                      | 5.4 ± 2.8    |
| <b>HR<sub>max</sub> [%]</b>                      | 14.8 ± 3.6   |
| <b>RHR [%]</b>                                   | 18.4 ± 6.6   |
| <b>log(HS)</b>                                   | 0.92 ± 0.40  |
| <b>log(FM)</b>                                   | 1.06 ± 0.48  |

Continuous variables, mean ± SD
